# Supplementary material for: Migrant integration policies and health inequalities in Europe
Source: PubMed Central journal article supplement (PMC4888480; doi:10.1186/s12889-016-3095-9), 2016-06-01

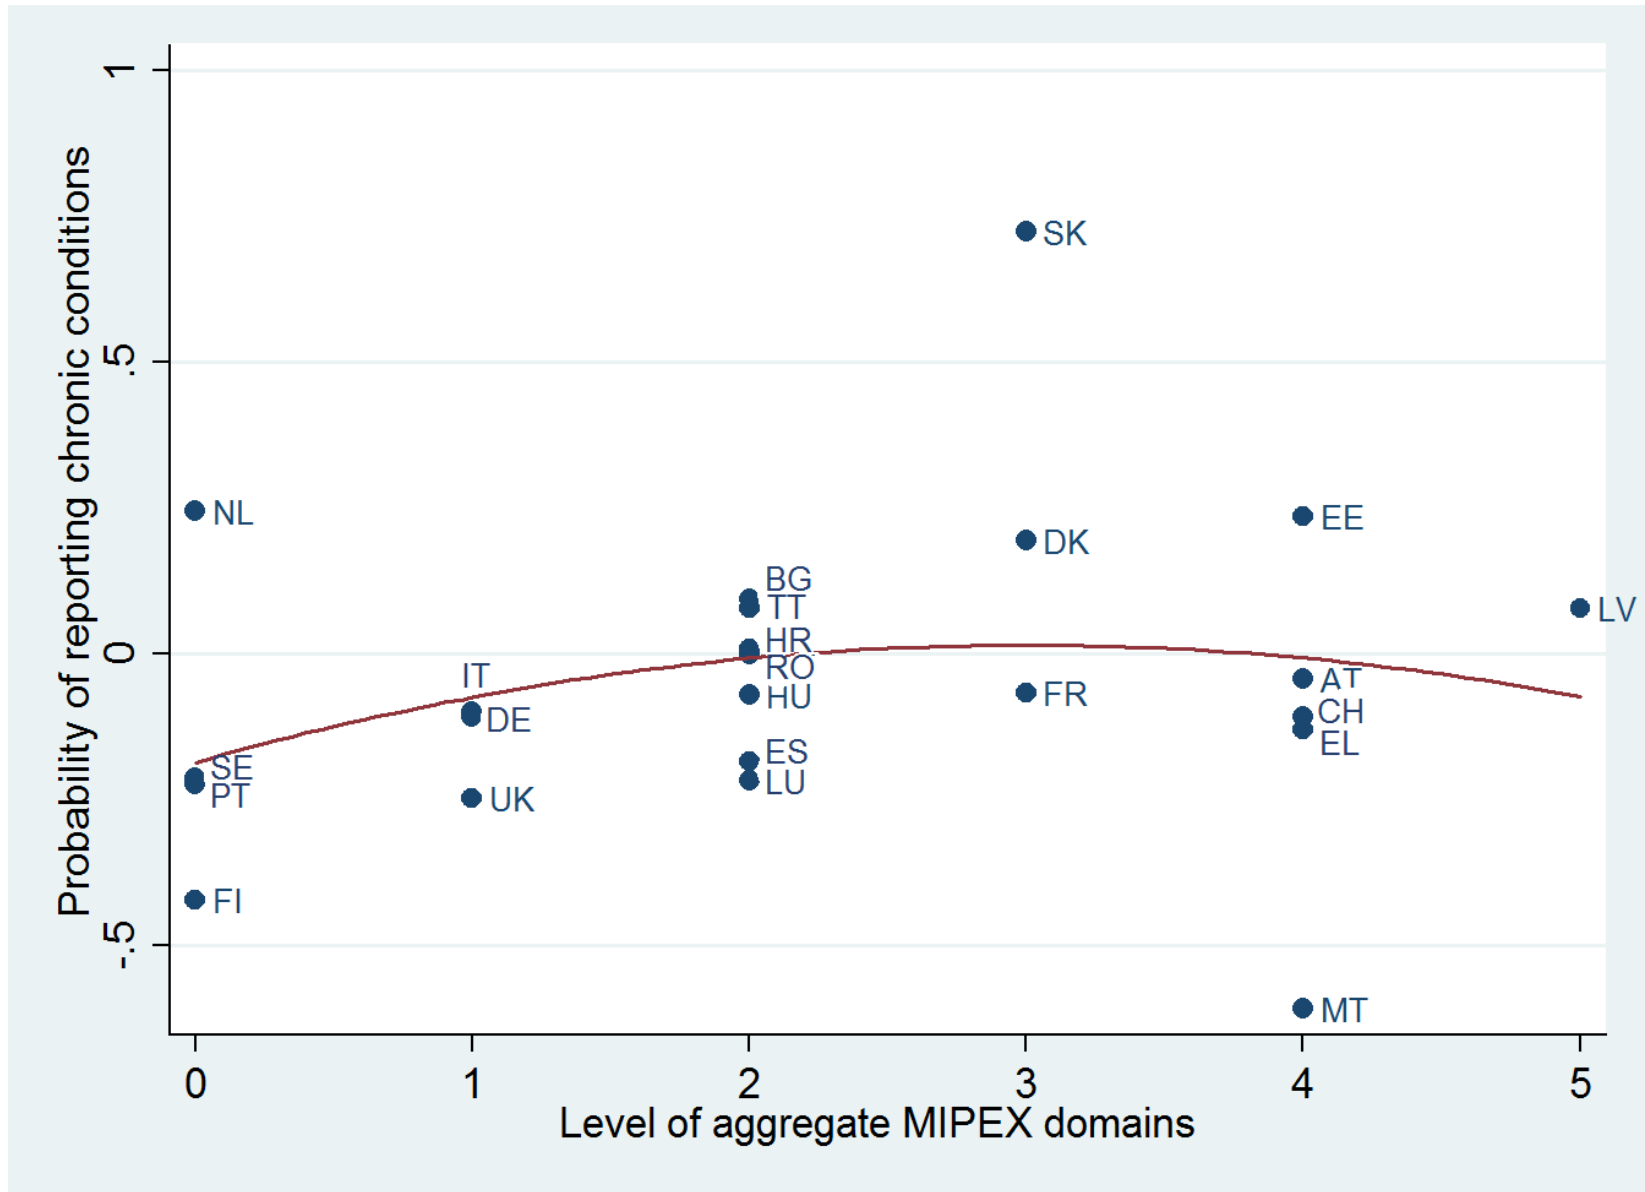

Supplement: 12889_2016_3095_MOESM2_ESM.pdf [file 12889_2016_3095_MOESM2_ESM.pdf]
